# Supplementary material
Source: PubMed Central journal article supplement (PMC3518936)
Supplement: brc-0007-0408-s01.pdf [file brc-0007-0408-s01.pdf]

# Peptide Receptor Radionuclide Therapy (PRRT) in a Patient Affected by Metastatic Breast Cancer with Neuroendocrine Differentiation

Giordano Savelli<sup>a</sup> Alberto Zaniboni<sup>b</sup> Francesco Bertagna<sup>c</sup> Giovanni Bosio<sup>c</sup> Lutfun Nisa<sup>c</sup>  
Carlo Rodella<sup>c</sup> Giorgio Biasiotto<sup>c</sup> Giovanni Bettinsoli<sup>c</sup> Elena Migliorati<sup>c</sup> Alessia Peli<sup>c</sup>  
Roberta Falchi<sup>a</sup> Francesca Giuffrida<sup>a</sup> Raffaele Giubbini<sup>c</sup>

<sup>a</sup>Nuclear Medicine Unit, 'Carlo Poma' Civic Hospital, Mantua,

<sup>b</sup>Oncology Division, 'IC Fondazione Poliambulanza',

<sup>c</sup>Nuclear Medicine Unit, 'Spedali Civili' Hospital, Brescia, Italy

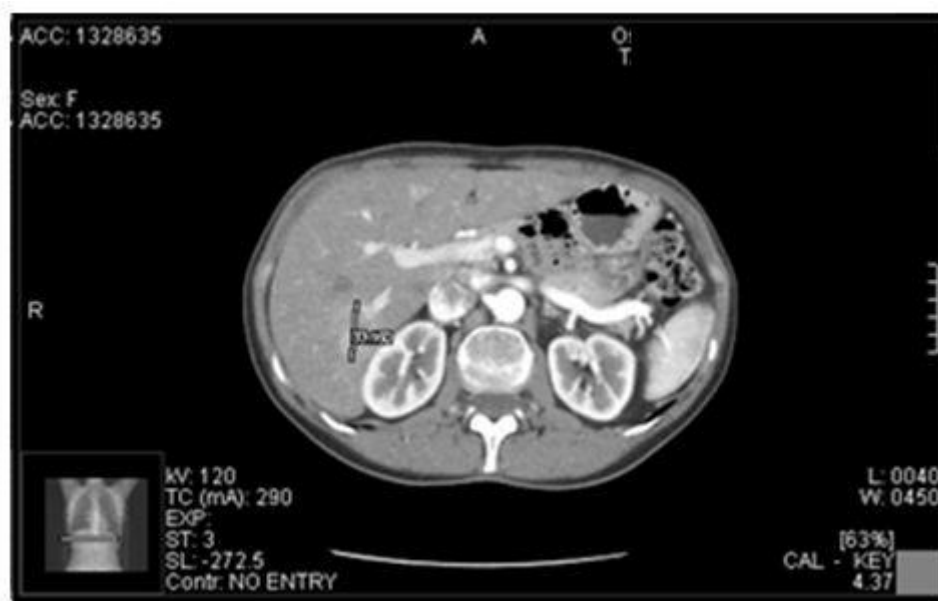

**Fig. 1.** Pre-therapeutic CT scan showing 1 of 3 liver lesions.

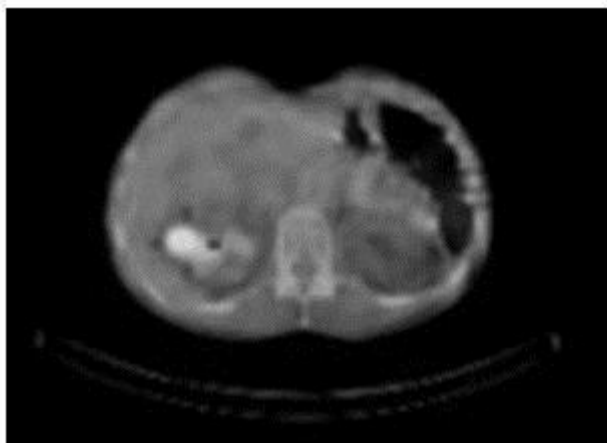

**Fig. 2.** Bremsstrahlung SPECT of the same metastases as in figure 1.

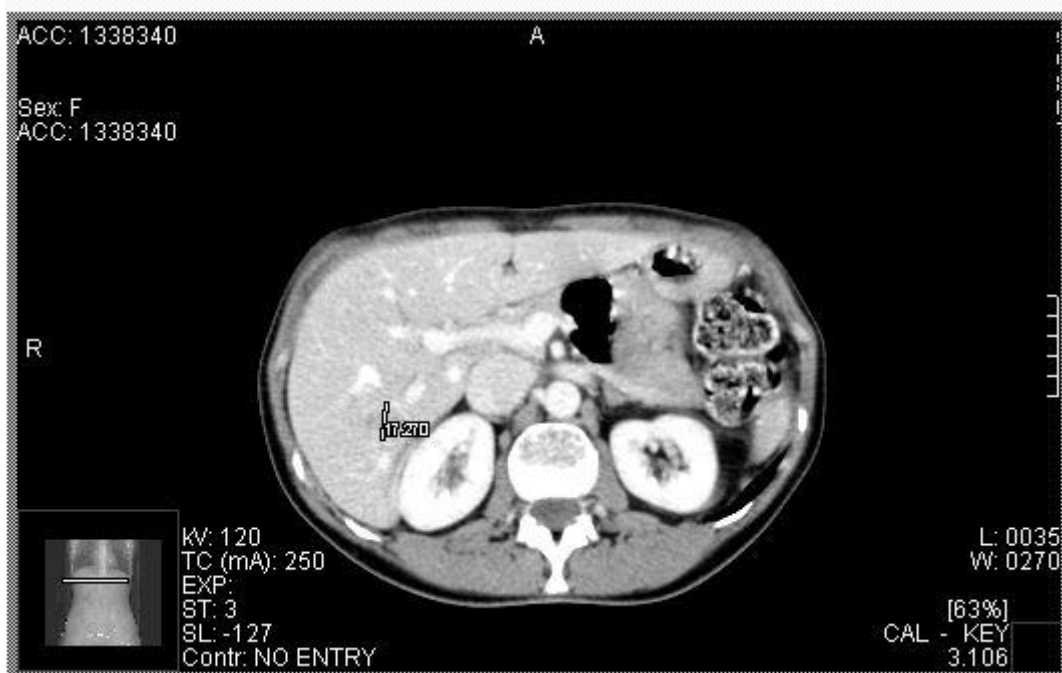

**Fig. 3.** CT scan at the same level as figure 1 after the first cycle of PRRT showing a reduction in metastasis diameter.

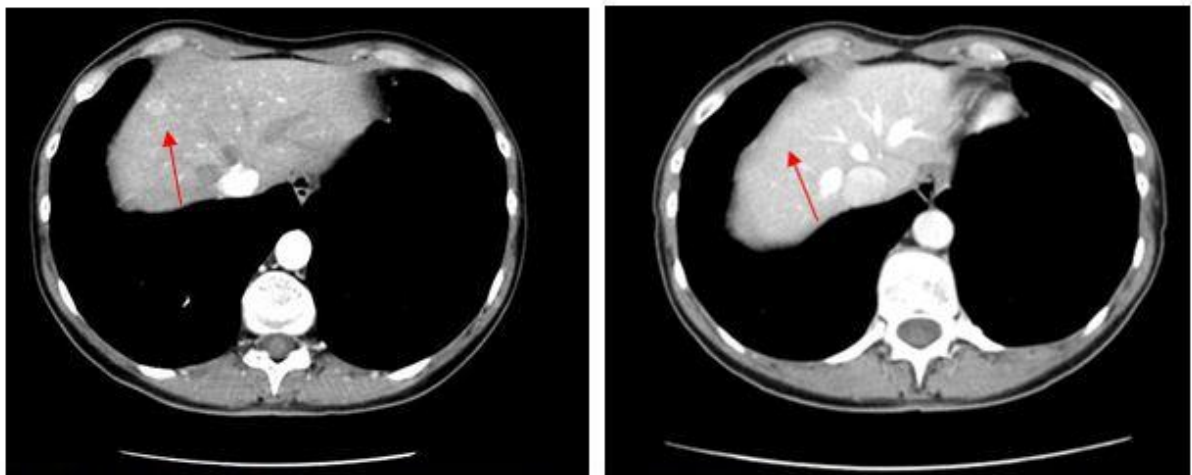

**Fig. 4.** Pre- (left) and post- (right) CT scan. Although the 2 slices are not exactly corresponding, it is possible to appreciate the disappearance of the 7th liver segment metastasis.

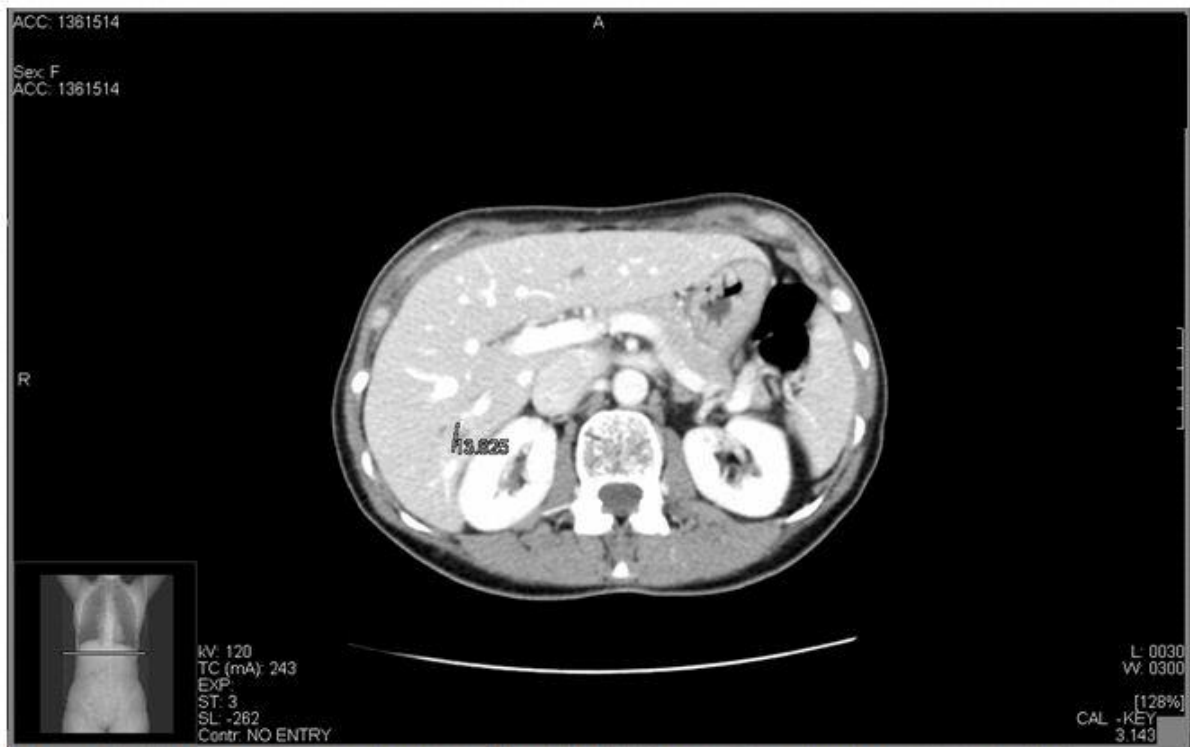

**Fig. 5.** CT scan after the 4th cycle of PRRT. The only metastasis detectable is reduced to 13 mm in diameter.
